# Supplementary material for: ES-SCLC Patients with PD-L1+ CTCs and High Percentages of CD8+PD-1+T Cells in Circulation Benefit from Front-Line Immunotherapy Treatment
Source: MDPI journal article supplement (doi:10.3390/biomedicines12010146), 2024-01-10
Supplement: s1 [file s1]

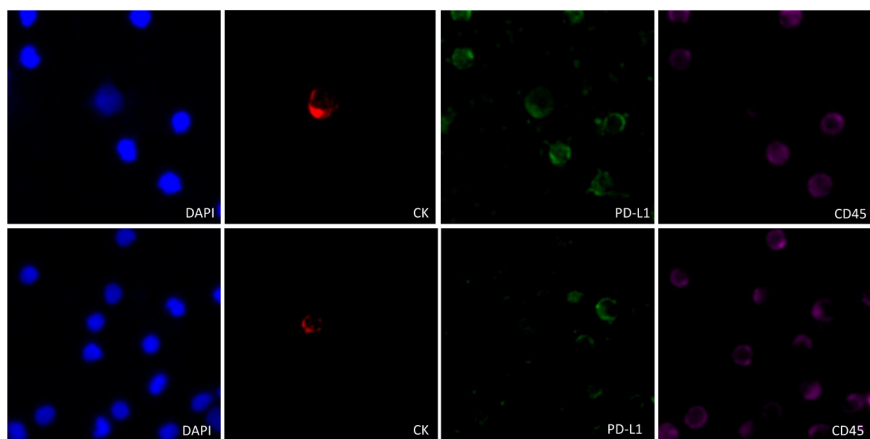

Figure S1: Representative pictures of stained CTCs.

Table S1. Number of CTCs detected for each patient.

| A/A | Stage     | Number of CTCs |               |               | % of CTCs       |                |
|-----|-----------|----------------|---------------|---------------|-----------------|----------------|
|     |           | CK+            | CK+PDL1+CD45- | CK+PDL1-CD45- | %CK+PDL1+C D45- | %CK+PDL1-CD45- |
| 1   | LIMITED   | 5              | 3             | 2             | 60,00           | 40,00          |
| 2   | EXTENSIVE | 0              | 0             | 0             | 0,00            | 0,00           |
| 3   | EXTENSIVE | 0              | 0             | 0             | 0,00            | 0,00           |
| 4   | EXTENSIVE | 3              | 0             | 3             | 0,00            | 100,00         |
| 5   | EXTENSIVE | 0              | 0             | 0             | 0,00            | 0,00%          |
| 6   | EXTENSIVE | 0              | 0             | 0             | 0,00            | 0,00           |
| 7   | EXTENSIVE | 0              | 0             | 0             | 0,00            | 0,00           |
| 8   | EXTENSIVE | 0              | 0             | 0             | 0,00            | 0,00           |
| 9   | EXTENSIVE | 0              | 0             | 0             | 0,00            | 0,00           |
| 10  | EXTENSIVE | 0              | 0             | 0             | 0,00            | 0,00           |
| 11  | EXTENSIVE | 0              | 0             | 0             | 0,00            | 0,00           |
| 12  | EXTENSIVE | 1              | 1             | 0             | 0,00            | 0,00           |
| 13  | LIMITED   | 0              | 0             | 0             | 0,00            | 0,00           |
| 14  | EXTENSIVE | 0              | 0             | 0             | 0,00            | 0,00           |
| 15  | EXTENSIVE | 0              | 0             | 0             | 0,00            | 0,00           |
| 16  | EXTENSIVE | 19             | 9             | 10            | 47,37           | 52,63          |
| 17  | EXTENSIVE | 2              | 1             | 1             | 50,00           | 50,00          |
| 18  | EXTENSIVE | 0              | 0             | 0             | 0,00            | 0,00           |
| 19  | EXTENSIVE | 0              | 0             | 0             | 0,00            | 0,00           |
| 20  | EXTENSIVE | 1              | 1             | 0             | 100,00          | 0,00           |
| 21  | EXTENSIVE | 0              | 0             | 0             | 0,00            | 0,00           |
| 22  | EXTENSIVE | 1              | 1             | 0             | 100,00          | 0,00           |
| 23  | EXTENSIVE | 0              | 0             | 0             | 0,00            | 0,00           |
| 24  | EXTENSIVE | 0              | 0             | 0             | 0,00            | 0,00           |
| 25  | LIMITED   | 0              | 0             | 0             | 0,00            | 0,00           |
| 26  | EXTENSIVE | 1              | 1             | 0             | 100,00          | 0,00           |
| 27  | EXTENSIVE | 1              | 1             | 0             | 100,00          | 0,00           |
| 28  | EXTENSIVE | 2              | 2             | 0             | 100,00          | 0,00           |
| 29  | EXTENSIVE | 0              | 0             | 0             | 0,00            | 0,00           |
| 30  | EXTENSIVE | 1              | 1             | 0             | 100,00          | 0,00           |
| 31  | EXTENSIVE | 1              | 0             | 1             | 0,00            | 100,00         |
| 32  | LIMITED   | 0              | 0             | 0             | 0,00            | 0,00           |
| 33  | EXTENSIVE | 0              | 0             | 0             | 0,00            | 0,00           |
| 34  | EXTENSIVE | 2              | 2             | 0             | 100,00          | 0,00           |
| 35  | EXTENSIVE | 6              | 5             | 1             | 83,33           | 16,67          |
| 36  | EXTENSIVE | 0              | 0             | 0             | 0,00            | 0,00           |
| 37  | LIMITED   | 1              | 0             | 1             | 0,00            | 100,00         |
| 38  | EXTENSIVE | 0              | 0             | 0             | 0,00            | 0,00           |
| 39  | EXTENSIVE | 70             | 13            | 57            | 18,57           | 81,43          |
| 40  | EXTENSIVE | 0              | 0             | 0             | 0,00            | 0,00           |
| 41  | LIMITED   | 0              | 0             | 0             | 0,00            | 0,00           |
| 42  | EXTENSIVE | 0              | 0             | 0             | 0,00            | 0,00           |
| 43  | EXTENSIVE | 23             | 15            | 8             | 65,22           | 34,78          |

Table S2. Associations of CTCs and clinical outcome of treatment naïve ES-SCLC patients.

| CTCs     | Groups | N of patients | Progresion Free Survival |                |         | Overall Survival |                |         |
|----------|--------|---------------|--------------------------|----------------|---------|------------------|----------------|---------|
|          |        |               | Median (days)            | 95% HR CI      | p value | Median (days)    | 95% CI         | p value |
| CK+CD45- | >1     | 8             | 176                      | 0.303 to 1.612 | 0.401   | 260              | 0.277 to 2.042 | 0.311   |
|          | <1     | 29            | 163                      |                |         | 232              |                |         |
| CK+CD45- | >3     | 5             | 167                      | 0.586 to 6.586 | 0.273   | 180              | 0.534 to 5.820 | 0.352   |
|          | <3     | 32            | 167                      |                |         | 261              |                |         |
| CK+CD45- | PD-L1+ | 13            | 172                      | 0.355 to 1.772 | 0.572   | 271              | 0.213 to 1.4   | 0.207   |
|          | other  | 24            | 158                      |                |         | 217              |                |         |

CTC: circulating tumor cell; CK : Cytokeratin; PD-L1: programmed death ligand 1; HR: hazard ratio, CI: confidence interval estimate.

Table S3. Prognostic significance of PD-L1+ CTCs or CK+ CTCs and CD3+CD8+ PD-1+ T-cells in patients with ES-SCLC.

|         | Corelations        | 95% HR CI        | p value | 95% CI           | p value      |
|---------|--------------------|------------------|---------|------------------|--------------|
| CK+CTCs | Group A vs Group B | 0.2972 to 3.230  | 0.973   | 0.2195 to 5.599  | 0.900        |
|         | Group A vs Group C | 0.01322 to 1.683 | 0.123   | 0.009 to 1.424   | 0.092        |
|         | Group A vs Group D | 0.1641 to 1.299  | 0.143   | 0.8630 to 1.635  | 0.061        |
|         | Group B vs Group C | 0.1580 to 3.667  | 0.733   | 0.07137 to 5.088 | 0.641        |
|         | Group B vs Group D | 0.2163 to 2.231  | 0.540   | 0.1321 to 2.354  | 0.426        |
|         | Group C vs Group D | 0.2758 to 4.800  | 0.847   | 0.1500 to 2.266  | 0.436        |
| CK+CTCs | Group A vs Group B | 0.3429 to 3.093  | 0.958   | 0.1755 to 3.838  | 0.801        |
|         | Group A vs Group D | 0.1726 to 1.177  | 0.103   | 0.099 to 0.8197  | <b>0.019</b> |
|         | Group B vs Group D | 0.208 to 1.614   | 0.297   | 0.1766 to 2.111  | 0.435        |

CTC: circulating tumor cell; CK : Cytokeratin; PD-1: programmed cell death receptor 1; PD-L1: programmed death ligand 1; HR: hazard ratio, CI: confidence interval estimate ; group A high CD3+CD8+PD-1+ T-cells (roc cut off) with PD-L1+CTCs (n=13) or CK+ CTCs (n= 15) , group B: high CD3+CD8+PD-1+ T-cells (roc cut off) without PD-L1+CTCs (n=12) or CK+ CTCs (n= 10) , group C: low CD3+CD8+PD-1+ T-cells (roc cut off) with PD-L1+CTCs (n=1) or or CK+ CTCs (n= 2) and group D: low CD3+CD8+PD-1+ T-cells (roc cut off) without PD-L1+CTCs (n=11) or CK+ CTCs (n= 10). Analysis of group C: low CD3+CD8+PD-1+ T-cells (roc cut off) with PD-L1+CTCs (n=1) was not performed as there was only one patient.

Table S4. Cox regression analysis.

| Risk Factor      | Parameter Estimate | P-Value | Hazard Ratio (HR) |
|------------------|--------------------|---------|-------------------|
|                  |                    |         | (95% CI for HR)   |
| Age, years       | 0,03028            | 0,5925  | 0,9288 to 1,167   |
| Liver Metastasis | 1,457              | 0,1939  | 0,6514 to 84,70   |
| Brain Metastasis | -0,7043            | 0,4463  | 0,06470 to 2,640  |
| Lung Metastasis  | -1,082             | 0,189   | 0,06282 to 1,754  |
| Bone Metastasis  | -1,678             | 0,3272  | 0,004018 to 6,483 |
| Tumor diameter   | -0,4144            | 0,7337  | 0,07486 to 14,32  |
| Smoking (py)     | 0,4356             | 0,578   | 0,3309 to 7,781   |
